# Supplementary material
Source: publisher figshare collection journal article supplement (https://tandf.figshare.com/ndownloader/files/13814408)
Supplement: Supplementary file 1 [file 13814408]

**Supporting Information**

Pyridine-2-olato chelated ruthenium(II) organometallics incorporating imine-phenol function: Spectroscopic, structural, electrochemical and theoretical studies

ANIKUL ISLAM, MRINAL KANTI GHOSH, SUMAN MONDAL, PAULA BRANDÃO and SWARUP CHATTOPADHYAY*

**Contents of Supporting Information**

**Figure S1.** IR spectrum of **2**(H).

**Figure S2.** IR spectrum of **2**(Me).

**Figure S3.** IR spectrum of **2**(OMe).

**Figure S4.** IR spectrum of **2**(Cl).

**Figure S5.** 1HNMR spectrum of **2**(H).

**Figure S6.** 1HNMR spectrum of **2**(Me).

**Figure S7.** 1HNMR spectrum of **2**(OMe).

**Figure S8.** 1HNMR spectrum of **2**(Cl).

**Figure S9.** Isodensity plot of frontier molecular orbitals of **2**(Me) using iso-value 0.05.

**Figure S10.** Isodensity plot of frontier molecular orbitals of **2**(OMe) using iso-value 0.05.

**Figure S11.** Isodensity plot of frontier molecular orbitals of **2**(Cl) using iso-value 0.05.

**Figure S12.** HOMO–LUMO energy gaps in the **2**(R) complexes

**Figure S13.** 13C NMR spectrum of **2**(H).

**Figure S14.** 13C NMR spectrum of **2**(Me).

**Figure S15.** 13C NMR spectrum of **2**(OMe).

**Figure S16.** 13C NMR spectrum of **2**(Cl).

**Figure S17.** 31P NMR spectrum of **2**(H).

**Figure S18.** 31P NMR spectrum of **2**(Me).

**Figure S19.** 31P NMR spectrum of **2**(OMe).

**Figure S20.** 31P NMR spectrum of **2**(Cl).

**Table S1:** Cartesian coordinates (Å) for DFT energy-minimized model of **2**(H).

**Table S2.** Cartesian coordinates (Å) for DFT energy-minimized model of **2**(Me).

**Table S3:** Cartesian coordinates (Å) for DFT energy-minimized model of **2**(OMe).

**Table S4.** Cartesian coordinates (Å) for DFT energy-minimized model of **2**(Cl).

**Table S5.** DFT calculated frontier molecular orbital composition (%) in the ground state for

**2**(Me).

**Table S6.** DFT calculated frontier molecular orbital composition (%) in the ground state for

**2**(OMe).

**Table S7.** DFT calculated frontier molecular orbital composition (%) in the ground state for

**2**(Cl).

**Preparation of NaOpy**

To a methanolic solution (40 mL) of NaOH (1g, 0.025M), 2-hydroxypyridine (2.4g, 0.025M) was added and the mixture was stirred for 1 h. After that the solvent was evaporated under reduced pressure and the solid mass was dried under high vacuum. Yield: 2.9 gm.

**Figure S1.** IR spectrum of **2**(H).

**Figure S2.** IR spectrum of **2**(Me).

**Figure S3.** IR spectrum of **2**(OMe).

**Figure S4.** IR spectrum of **2**(Cl).


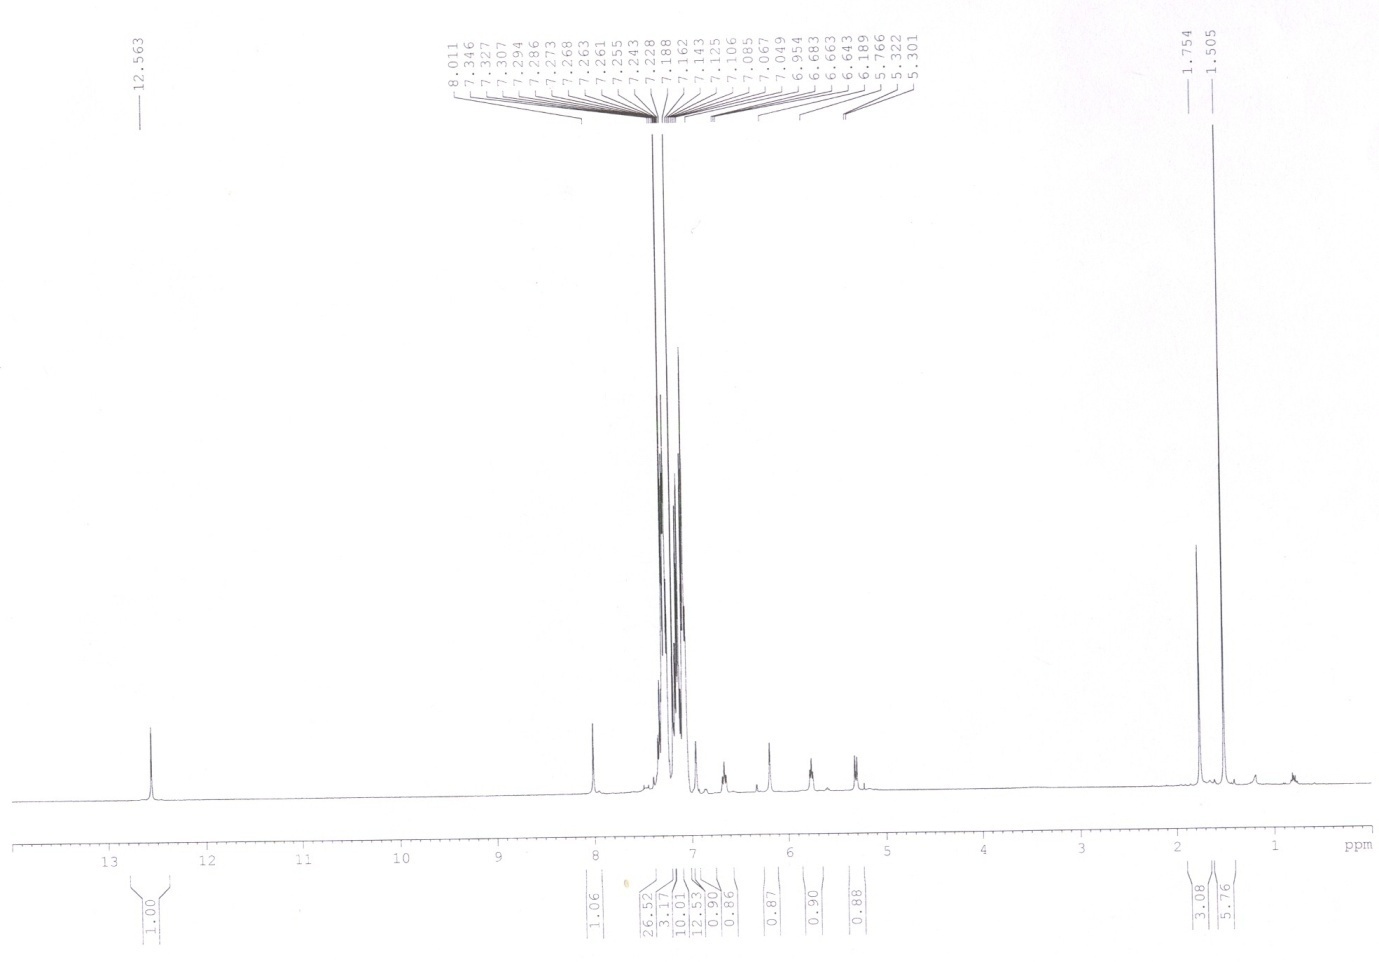


**Figure S5.** 1HNMR spectrum of **2**(H).


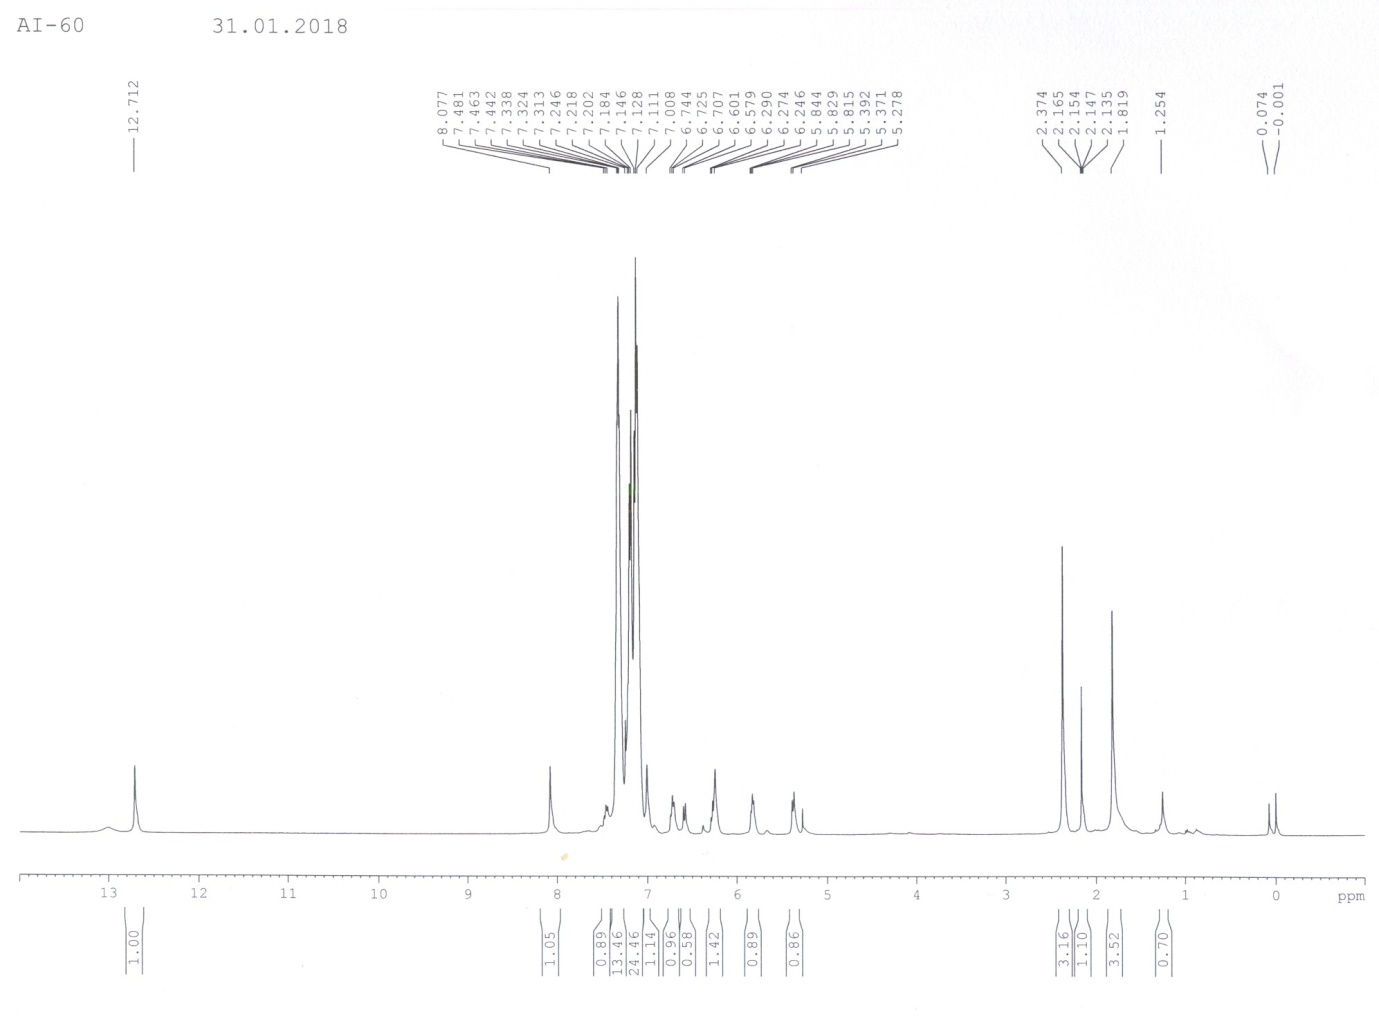


**Figure S6.** 1HNMR spectrum of **2**(Me).


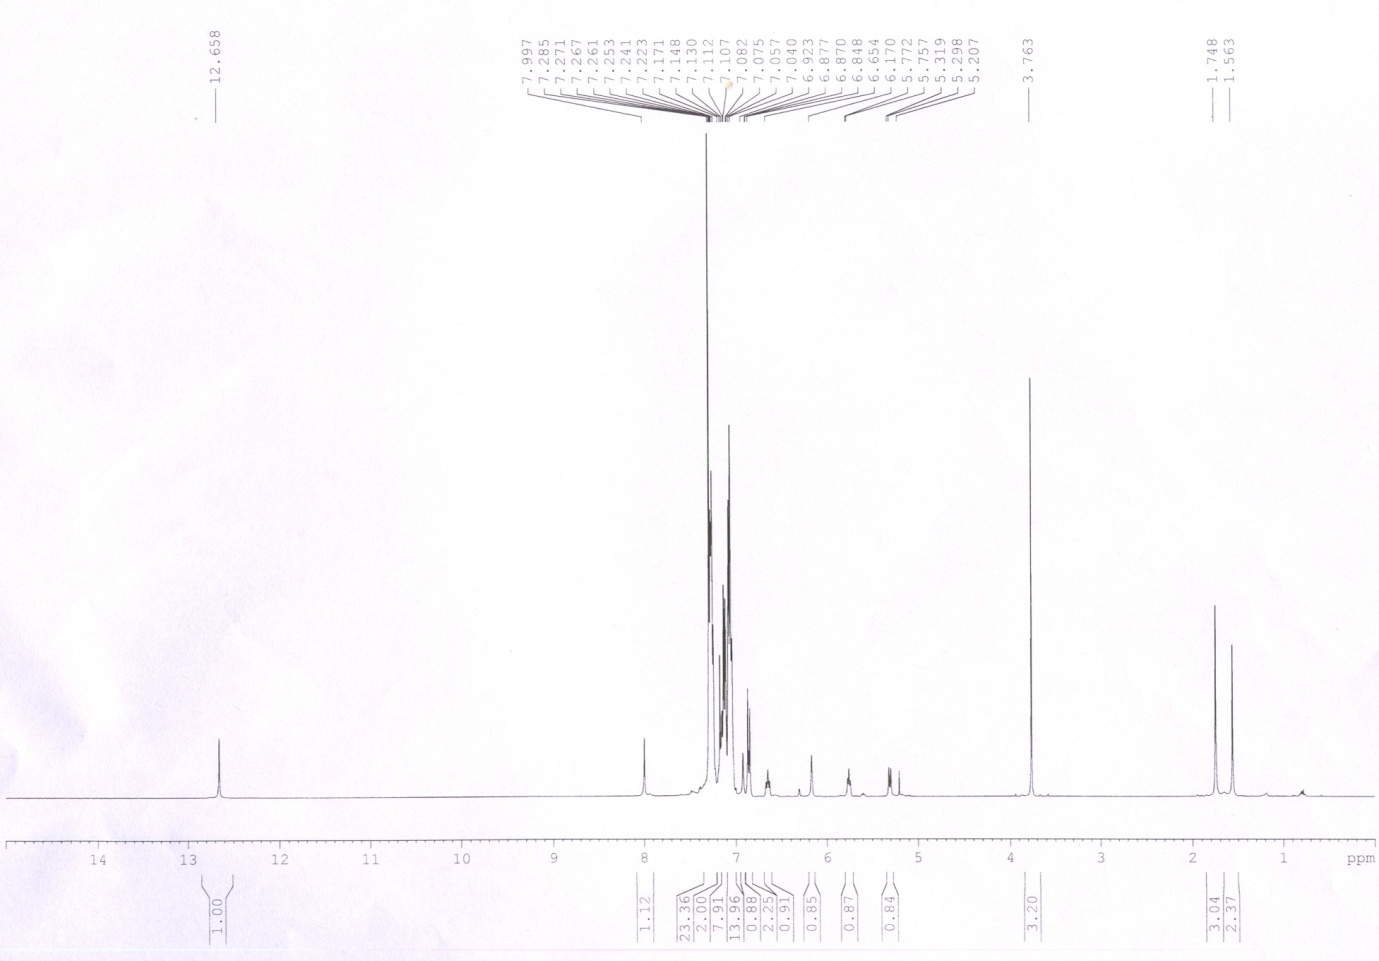


**Figure S7.** 1HNMR spectrum of **2**(OMe).


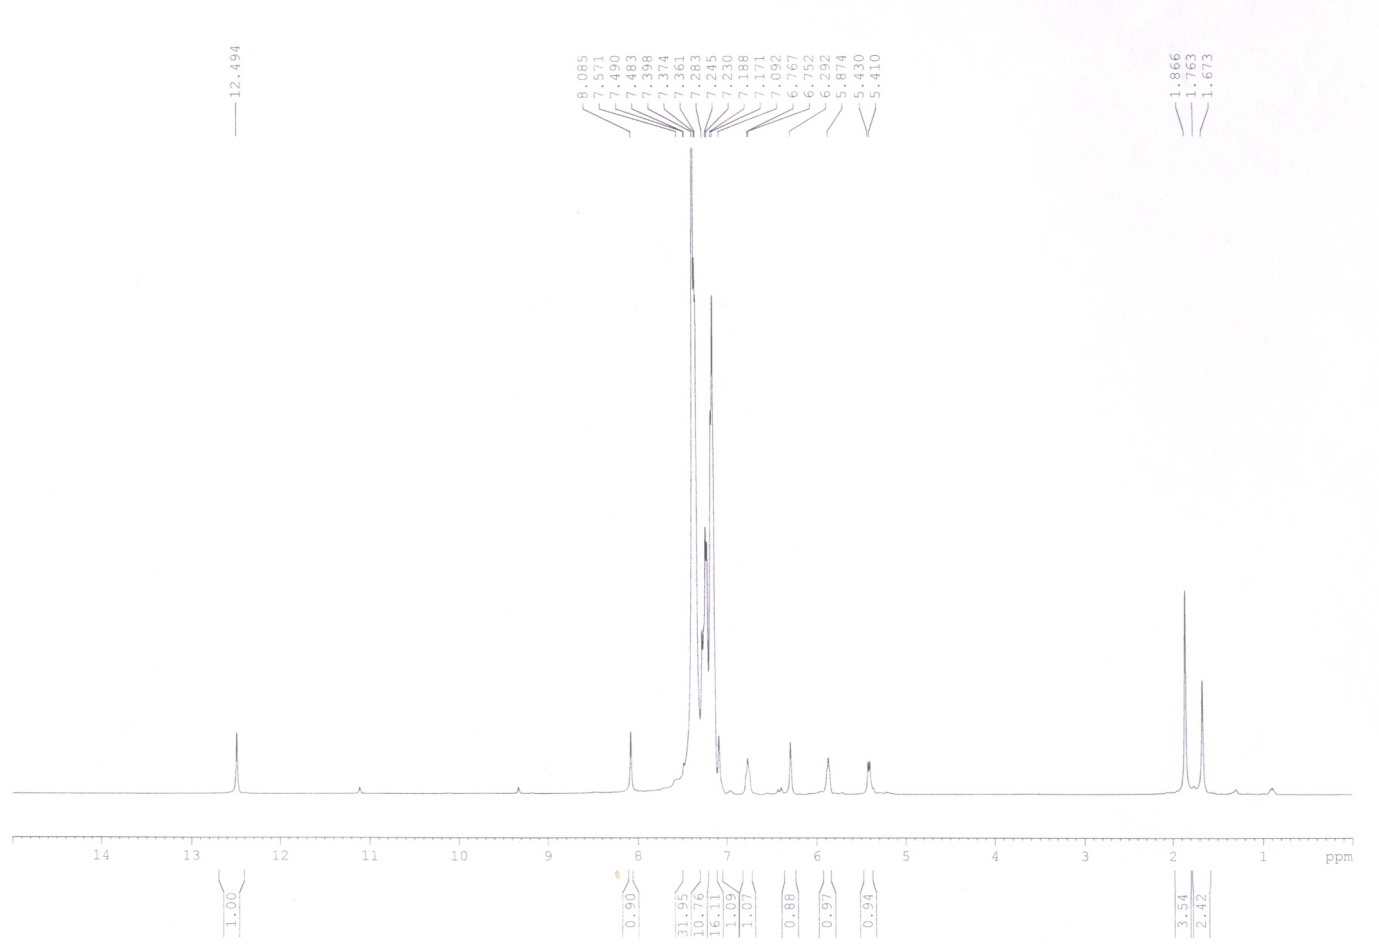


**Figure S8.** 1HNMR spectrum of **2**(Cl).

| 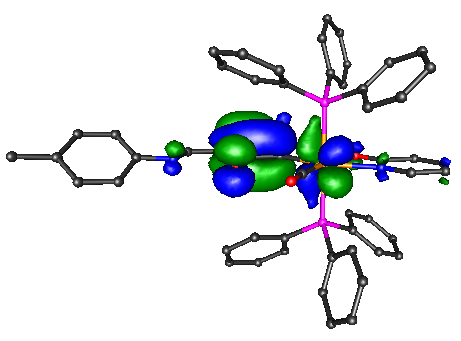  **HOMO** | 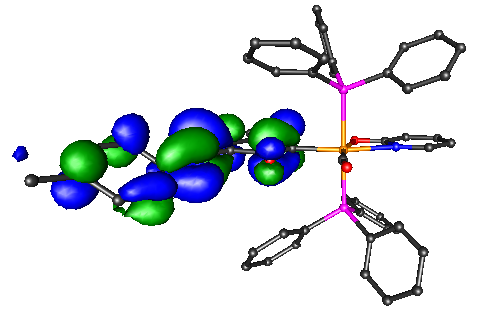  **LUMO** |
| --- | --- |

**Figure S9.** Isodensity plot of frontier molecular orbitals of **2**(Me) using iso-value 0.05.

| 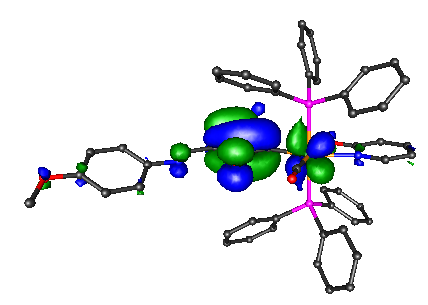  **HOMO** | 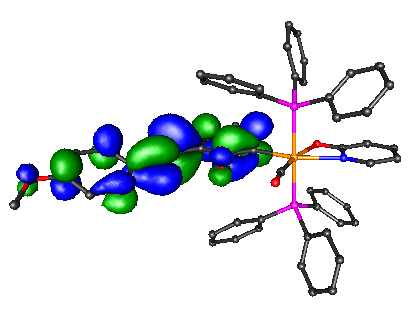  **LUMO** |
| --- | --- |

**Figure S10.** Isodensity plot of frontier molecular orbitals of **2**(OMe) using iso-value 0.05.

| 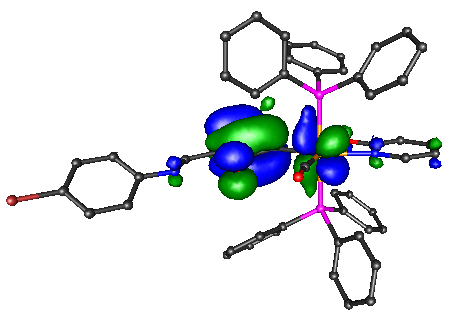  **HOMO** | 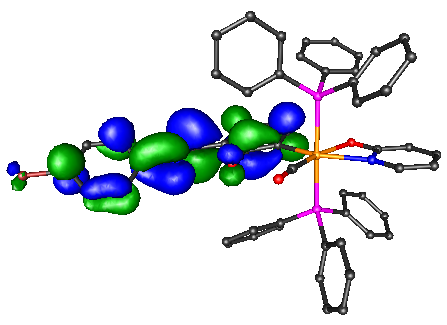  **LUMO** |
| --- | --- |

**Figure S11.** Isodensity plot of frontier molecular orbitals of **2**(Cl) using iso-value 0.05.

**Figure S12.** HOMO–LUMO energy gaps in the **2**(R) complexes.

**
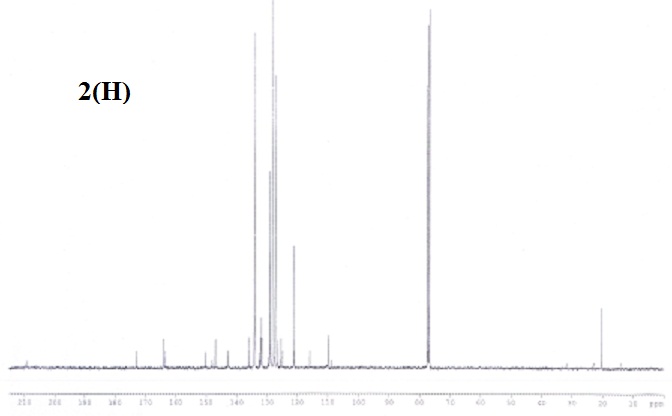
**

**Figure S13.** 13C NMR spectrum of **2**(H).


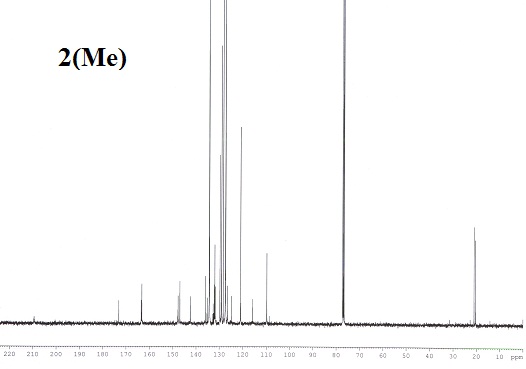


**Figure S14.** 13C NMR spectrum of **2**(Me).


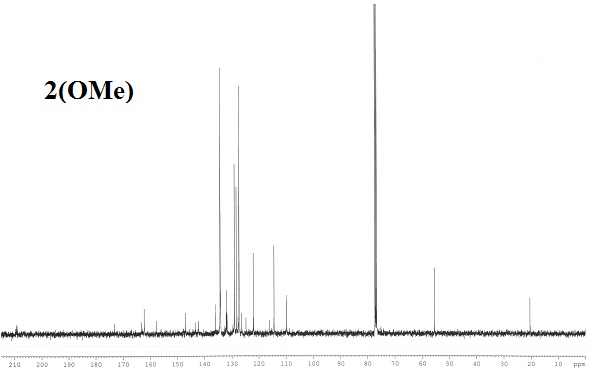


**Figure S15.** 13C NMR spectrum of **2**(OMe).

**
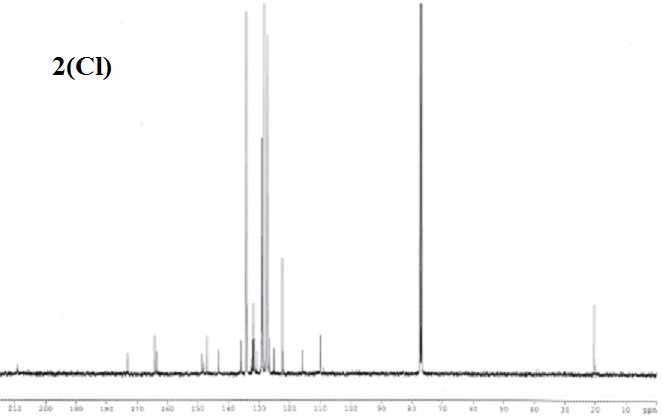
**

**Figure S16.** 13C NMR spectrum of **2**(Cl).

**
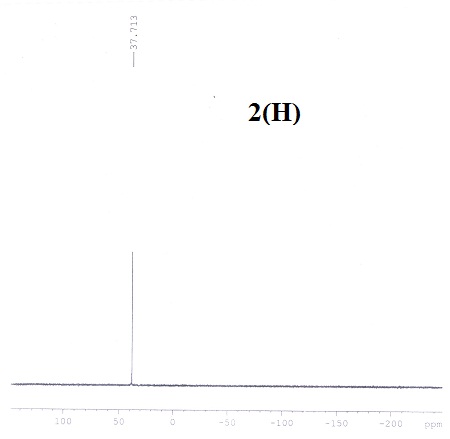
**

**Figure S17.** 31P NMR spectrum of **2**(H).

**
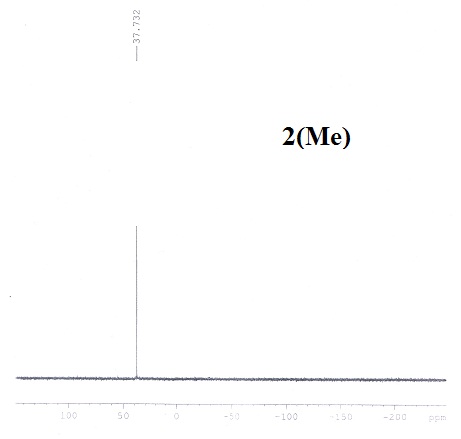
**

**Figure S18.** 31P NMR spectrum of **2**(Me).

**
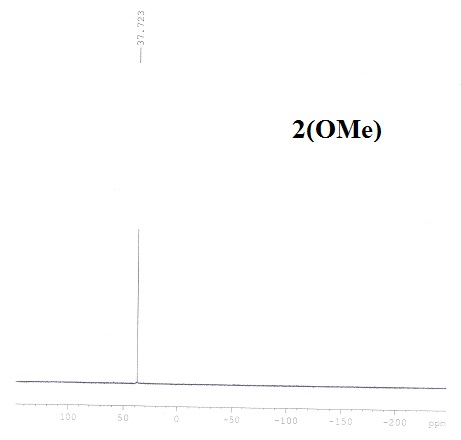
**

**Figure S19.** 31P NMR spectrum of **2**(OMe).

**
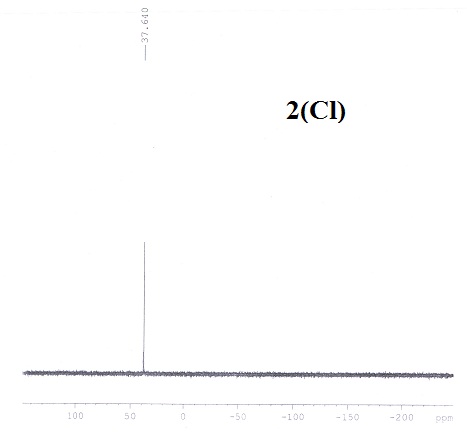
**

**Figure S20.** 31P NMR spectrum of **2**(Cl).

**Table S1.** Cartesian coordinates (Å) for DFT energy-minimized model of **2**(H).

| Atom x y z |
| --- |

Ru 7.795784 12.836344 12.559358

P 9.343836 14.492014 13.416317

P 6.147598 11.311547 11.665619

O 6.141117 14.257968 12.927121

O 10.147523 12.227168 10.125271

H 10.825593 12.131579 9.349644

O 9.883245 10.680931 12.787522

N 6.752380 12.834780 14.538605

N 11.352572 12.504628 7.862673

C 5.926888 13.864550 14.150935

C 4.950686 14.387091 15.045977

H 4.322387 15.224081 14.718775

C 4.838581 13.817334 16.315989

H 4.093447 14.204677 17.025269

C 5.680393 12.745104 16.690834

H 5.605313 12.272884 17.677068

C 6.624044 12.289634 15.763709

H 7.297762 11.454158 16.000018

C 8.176211 13.521643 10.612814

C 9.248038 13.168834 9.742594

C 9.387782 13.783413 8.449365

C 8.450402 14.769473 8.034096

H 8.575861 15.233634 7.043934

C 7.385475 15.133428 8.855574

C 7.274932 14.490503 10.121990

H 6.419003 14.769124 10.755340

C 10.456539 13.407956 7.553227

H 10.499848 13.935486 6.576852

C 12.335587 12.078608 6.951917

C 12.132018 12.029964 5.549350

H 11.157956 12.315951 5.130495

C 13.152211 11.575291 4.699035

H 12.973756 11.533634 3.615117

C 14.388346 11.156240 5.225203

H 15.182011 10.797366 4.556344

C 14.590993 11.182718 6.618116

H 15.547548 10.846628 7.041470

C 13.573707 11.629271 7.473800

H 13.720301 11.648042 8.562442

C 6.362581 16.168619 8.435423

H 6.541431 16.520573 7.401821

H 6.382284 17.058236 9.097545

H 5.332887 15.760027 8.480862

C 9.095734 11.539624 12.613759

C 10.610917 15.206716 12.251255

C 11.625386 14.340521 11.784135

H 11.627446 13.284462 12.080732

C 12.629737 14.819661 10.928253

H 13.408178 14.132883 10.569795

C 12.633129 16.166343 10.521159

H 13.416671 16.536853 9.845631

C 11.628659 17.032549 10.982824

H 11.621914 18.086827 10.673724

C 10.624381 16.557783 11.846772

H 9.859286 17.253797 12.212088

C 8.489792 15.987664 14.111746

C 7.645158 16.740661 13.262003

H 7.501959 16.432057 12.219347

C 6.976462 17.875770 13.749062

H 6.329928 18.454325 13.074945

C 7.121568 18.261621 15.094256

H 6.595586 19.148186 15.474188

C 7.936444 17.502893 15.950666

H 8.048500 17.789295 17.005352

C 8.616917 16.372006 15.464016

H 9.250630 15.790392 16.144767

C 10.455497 13.956638 14.810041

C 11.566902 14.748251 15.183565

H 11.791771 15.671175 14.632568

C 12.390050 14.360407 16.252712

H 13.249785 14.985452 16.530797

C 12.120203 13.173243 16.958795

H 12.768498 12.868347 17.791867

C 11.024260 12.377014 16.588208

H 10.814484 11.442093 17.125100

C 10.196743 12.767721 15.519971

H 9.349204 12.139676 15.225731

C 4.748528 12.183026 10.816981

C 3.780337 12.893235 11.564417

H 3.816938 12.892197 12.660805

C 2.759124 13.604918 10.912126

H 2.008683 14.142711 11.507979

C 2.701598 13.636784 9.507040

H 1.901677 14.193518 8.999212

C 3.676563 12.956533 8.756988

H 3.647875 12.981890 7.658521

C 4.694259 12.235324 9.406366

H 5.449575 11.710499 8.808579

C 6.621813 10.008081 10.421047

C 7.931296 9.913541 9.912501

H 8.706139 10.620832 10.229452

C 8.257559 8.908587 8.980586

H 9.283379 8.849693 8.593035

C 7.282952 7.995018 8.549404

H 7.540736 7.212898 7.821529

C 5.971996 8.083541 9.056500

H 5.201885 7.372096 8.727655

C 5.644303 9.079878 9.988395

H 4.620939 9.132621 10.382258

C 5.332994 10.217357 12.939045

C 6.189795 9.522515 13.822928

H 7.274342 9.692522 13.776153

C 5.669587 8.603490 14.748682

H 6.351031 8.063610 15.420637

C 4.282867 8.374351 14.815273

H 3.874619 7.658320 15.542179

C 3.423651 9.063778 13.944054

H 2.339374 8.887917 13.983648

C 3.944355 9.975457 13.006744

H 3.259201 10.492416 12.322146

|  |
| --- |

**Table S2:** Cartesian coordinates (Å) for DFT energy-minimized model of **2**(Me).

| Atom x y z |
| --- |

Ru -2.247020 1.012135 -1.499131

P -3.165124 3.112963 -0.713027

P -1.348531 -1.102378 -2.283642

C 6.163432 0.878258 6.359688

O -2.612170 1.718265 -3.579288

O -2.498377 -0.193637 1.244278

O 0.195500 1.054400 0.891232

N -4.202967 0.578543 -2.498521

N 2.512436 1.562793 1.929712

C -2.313177 0.309927 0.196670

C -0.301299 1.760888 -1.353760

C 0.593151 1.672521 -0.244812

C 1.917184 2.232020 -0.316836

C 2.342264 2.885899 -1.506877

C 1.494124 2.991294 -2.607830

C 0.192035 2.423400 -2.496892

C 1.920719 3.680384 -3.887868

C 2.831087 2.141492 0.799732

C 3.438696 1.411166 2.976743

C 2.955108 1.411678 4.306534

C 3.833906 1.262045 5.387826

C 5.221204 1.081677 5.191969

C 5.694509 1.056894 3.860831

C 4.827508 1.214828 2.770707

C -3.821337 1.229324 -3.646343

C -4.701854 1.312293 -4.760848

C -5.955257 0.704762 -4.665980

C -6.326874 0.023753 -3.483528

C -5.412068 -0.011791 -2.425603

C -4.489682 2.989440 0.590800

C -5.209427 1.789684 0.764244

C -6.234171 1.702031 1.723348

C -6.551918 2.814891 2.520157

C -5.838540 4.016548 2.355082

C -4.813081 4.103669 1.399351

C -2.019026 4.344984 0.083632

C -1.274916 3.910373 1.202795

C -0.440127 4.805100 1.890958

C -0.328540 6.141659 1.466317

C -1.063619 6.579204 0.352292

C -1.909184 5.688182 -0.334356

C -3.998330 4.098627 -2.048333

C -5.383120 4.370273 -2.030365

C -5.979739 5.103134 -3.072651

C -5.200515 5.571872 -4.143434

C -3.820851 5.296282 -4.173954

C -3.223722 4.556177 -3.140268

C -0.071709 -1.894604 -1.183564

C -0.342837 -2.999890 -0.350894

C 0.667701 -3.543625 0.463577

C 1.959483 -2.993166 0.452530

C 2.238533 -1.895234 -0.381696

C 1.232962 -1.348298 -1.193564

C -2.682194 -2.397143 -2.422326

C -2.925834 -3.104487 -3.619075

C -3.960160 -4.055367 -3.690099

C -4.757788 -4.322352 -2.565248

C -4.528468 -3.616693 -1.369897

C -3.510340 -2.650771 -1.302487

C -0.484384 -1.223033 -3.931133

C -0.672211 -0.238365 -4.924318

C -0.044393 -0.369613 -6.177965

C 0.773452 -1.478070 -6.453120

C 0.964122 -2.463370 -5.466267

C 0.342471 -2.337027 -4.213308

H 6.395397 -0.196043 6.511343

H 5.727618 1.255041 7.303703

H 7.128035 1.397668 6.202044

H 0.987962 1.092971 1.549340

H 3.357965 3.307915 -1.542680

H -0.467890 2.505135 -3.374092

H 2.968385 4.030775 -3.829897

H 1.286428 4.562733 -4.108060

H 1.841548 3.001665 -4.761287

H 3.830146 2.608576 0.668367

H 1.878159 1.547893 4.474188

H 3.432395 1.281590 6.411767

H 6.766679 0.895914 3.672660

H 5.223583 1.152477 1.747657

H -4.376139 1.848745 -5.659449

H -6.652691 0.755136 -5.514326

H -7.300381 -0.470535 -3.387080

H -5.641080 -0.539737 -1.490287

H -4.957121 0.919029 0.150084

H -6.778686 0.756789 1.851854

H -7.349772 2.745457 3.272669

H -6.077403 4.890462 2.976778

H -4.257208 5.043755 1.285055

H -1.337592 2.865756 1.535435

H 0.133253 4.450031 2.757837

H 0.330559 6.838443 2.002279

H -0.985771 7.621328 0.012769

H -2.487528 6.049712 -1.193306

H -6.002690 4.013414 -1.197985

H -7.058429 5.309410 -3.041619

H -5.666081 6.147622 -4.955675

H -3.205168 5.652860 -5.011291

H -2.151555 4.329342 -3.183419

H -1.339267 -3.457904 -0.341925

H 0.439679 -4.407144 1.103407

H 2.748111 -3.417994 1.088242

H 3.245464 -1.457430 -0.400580

H 1.466660 -0.493938 -1.841452

H -2.308678 -2.912615 -4.505537

H -4.137714 -4.590900 -4.632793

H -5.559825 -5.071611 -2.620162

H -5.149448 -3.812426 -0.484660

H -3.362843 -2.092136 -0.368824

H -1.311471 0.628525 -4.711188

H -0.198157 0.405793 -6.941574

H 1.263186 -1.575676 -7.431770

H 1.602399 -3.334355 -5.670317

H 0.504171 -3.109237 -3.450041

|  |
| --- |

**Table S3.** Cartesian coordinates (Å) for DFT energy-minimized model of **2**(OMe).

| Atom x y z |
| --- |

Ru -2.869323 -0.090697 1.076908

P -2.111048 1.969927 2.100024

P -3.632855 -2.167390 0.073923

O 5.920812 -0.553248 -6.070545

O -4.943880 0.715991 1.178626

O -0.240559 -1.423104 1.672645

O -0.189803 -0.176783 -1.035971

N -4.131062 -0.480273 2.883386

N 1.168992 0.281457 -3.183929

C -1.230850 -0.871134 1.355186

C -2.440383 0.648020 -0.830225

C -1.230160 0.502322 -1.572555

C -1.095752 1.070722 -2.887613

C -2.184618 1.786136 -3.458873

C -3.382100 1.944536 -2.763343

C -3.474053 1.368571 -1.463619

C -4.557051 2.701531 -3.348106

C 0.128599 0.929682 -3.644148

C 2.340588 0.084854 -3.934640

C 3.538551 -0.171291 -3.229876

C 4.756135 -0.379894 -3.897279

C 4.793073 -0.354817 -5.307899

C 3.597989 -0.127720 -6.028648

C 2.393363 0.086776 -5.354821

C -5.189666 0.223427 2.362855

C -6.405790 0.349341 3.090613

C -6.502335 -0.269735 4.338113

C -5.408969 -1.004164 4.853202

C -4.242902 -1.081465 4.083862

C -1.013281 1.792359 3.595478

C -0.990086 0.586867 4.326156

C -0.195129 0.464124 5.480005

C 0.586416 1.547047 5.917084

C 0.573107 2.753022 5.191927

C -0.218249 2.875068 4.037897

C -1.102171 3.157956 1.082447

C 0.072674 2.659506 0.477163

C 0.917261 3.516778 -0.246213

C 0.596850 4.879804 -0.382852

C -0.571981 5.380953 0.213871

C -1.416569 4.526883 0.947280

C -3.500577 3.021265 2.742265

C -3.674964 3.278248 4.118852

C -4.755997 4.059539 4.566686

C -5.673069 4.592340 3.645700

C -5.512127 4.331785 2.272099

C -4.440807 3.542437 1.822488

C -2.426962 -2.998194 -1.075310

C -1.678139 -4.139836 -0.723573

C -0.772002 -4.706782 -1.638668

C -0.606692 -4.143101 -2.914031

C -1.358280 -3.010097 -3.274437

C -2.261870 -2.440414 -2.364395

C -3.979793 -3.456928 1.373711

C -5.231251 -4.100139 1.483265

C -5.463739 -5.045697 2.499080

C -4.447485 -5.371774 3.412286

C -3.199218 -4.729683 3.317307

C -2.971777 -3.768565 2.317752

C -5.171752 -2.215655 -0.977580

C -6.128058 -1.179981 -0.918012

C -7.300379 -1.254334 -1.694500

C -7.530885 -2.356776 -2.533705

C -6.580461 -3.393061 -2.597023

C -5.407895 -3.322945 -1.827785

C 7.151778 -0.802530 -5.389754

H 0.566142 -0.170875 -1.740111

H -2.064819 2.213603 -4.465958

H -4.425466 1.493970 -0.923977

H -4.345945 3.045939 -4.377770

H -4.808116 3.596651 -2.743620

H -5.469338 2.072344 -3.384894

H 0.155199 1.417527 -4.641016

H 3.503249 -0.195761 -2.132211

H 5.662316 -0.566143 -3.309532

H 3.637977 -0.140278 -7.126089

H 1.473982 0.227047 -5.938803

H -7.230120 0.926690 2.656249

H -7.431617 -0.186699 4.919446

H -5.461272 -1.506686 5.825646

H -3.369171 -1.652118 4.426455

H -1.591978 -0.261216 3.982732

H -0.183643 -0.484648 6.033511

H 1.208048 1.451575 6.817791

H 1.184378 3.603738 5.523241

H -0.215186 3.817803 3.475300

H 0.326559 1.594455 0.559222

H 1.824684 3.111810 -0.713682

H 1.256327 5.547861 -0.953921

H -0.831525 6.444209 0.114807

H -2.317937 4.936654 1.418735

H -2.964055 2.871305 4.848493

H -4.876127 4.252521 5.641738

H -6.514898 5.205778 3.996361

H -6.229040 4.737838 1.545467

H -4.335681 3.327001 0.752129

H -1.807251 -4.607800 0.259616

H -0.199221 -5.598571 -1.349586

H 0.102377 -4.585021 -3.627388

H -1.240221 -2.561943 -4.269828

H -2.843386 -1.558513 -2.661349

H -6.034337 -3.862165 0.774971

H -6.447019 -5.530386 2.570706

H -4.627950 -6.117453 4.199001

H -2.397252 -4.971630 4.028641

H -1.999694 -3.259901 2.276439

H -5.950056 -0.317792 -0.261810

H -8.035456 -0.438807 -1.640041

H -8.446820 -2.410546 -3.138590

H -6.749838 -4.259948 -3.251021

H -4.670593 -4.134308 -1.892221

H 7.911567 -0.926805 -6.179856

H 7.102183 -1.729493 -4.780585

H 7.438756 0.049519 -4.737358

|  |
| --- |

**Table S4.** Cartesian coordinates (Å) for DFT energy-minimized model of **2**(Cl).

| Atom x y z |
| --- |

Ru 7.126465 13.043928 12.670923

P 8.643175 14.713259 13.556793

P 5.510199 11.500399 11.748625

Cl 15.136545 10.730706 4.432733

O 5.455676 14.459220 12.987363

O 9.219488 10.901471 12.958558

O 9.545997 12.443254 10.303755

H 10.241709 12.344665 9.547163

N 6.030474 13.046074 14.620805

N 10.796267 12.703859 8.058549

C 8.431668 11.755421 12.763597

C 7.550584 13.720365 10.730958

C 8.646472 13.371266 9.889707

C 8.809765 13.973496 8.592950

C 7.873264 14.947612 8.146585

H 8.016870 15.402962 7.154904

C 6.787576 15.309707 8.940263

C 6.653098 14.676667 10.209769

H 5.779795 14.952935 10.820014

C 5.765353 16.332045 8.488451

H 5.963699 16.676248 7.455940

H 5.763148 17.227293 9.143017

H 4.738944 15.913971 8.515984

C 9.896767 13.595886 7.722472

H 9.951822 14.109976 6.739489

C 11.788381 12.268205 7.166644

C 13.020988 11.822952 7.705604

H 13.160669 11.854590 8.794493

C 14.051413 11.361547 6.876006

H 15.005093 11.027395 7.302462

C 13.850734 11.322343 5.484569

C 12.628411 11.731828 4.924009

H 12.474683 11.668696 3.839265

C 11.605291 12.199004 5.761774

H 10.639355 12.479232 5.321475

C 5.211376 14.070652 14.207116

C 4.209883 14.592687 15.074054

H 3.586856 15.425661 14.727231

C 4.066115 14.026735 16.342553

H 3.300370 14.413179 17.030051

C 4.901757 12.959136 16.743679

H 4.801846 12.489953 17.729092

C 5.871791 12.504527 15.843987

H 6.542354 11.672691 16.101324

C 7.765944 16.212620 14.214520

C 6.938906 16.952548 13.336481

H 6.821086 16.631369 12.294452

C 6.254833 18.090575 13.794346

H 5.622449 18.658793 13.098460

C 6.366778 18.492498 15.137971

H 5.829042 19.381529 15.495011

C 7.163677 17.746686 16.022171

H 7.249654 18.045658 17.075843

C 7.859360 16.612851 15.564970

H 8.478467 16.041390 16.267458

C 9.717956 14.192795 14.984125

C 9.445411 13.007071 15.694280

H 8.608516 12.373651 15.381455

C 10.245910 12.626433 16.786382

H 10.025820 11.694005 17.323511

C 11.328591 13.429401 17.180597

H 11.955922 13.132274 18.032227

C 11.612126 14.613382 16.474602

H 12.461900 15.243490 16.771284

C 10.815773 14.991425 15.382049

H 11.051394 15.911994 14.831577

C 9.940284 15.420550 12.420338

C 9.952044 16.763746 11.990476

H 9.167882 17.457611 12.317492

C 10.979433 17.234354 11.151698

H 10.971567 18.282593 10.823021

C 12.009285 16.372073 10.741213

H 12.811843 16.739769 10.086898

C 12.007368 15.033298 11.173724

H 12.806922 14.350006 10.857291

C 10.979655 14.557983 12.003715

H 10.984466 13.508202 12.321802

C 4.689007 10.393206 13.005955

C 3.303816 10.125825 13.042455

H 2.624745 10.630986 12.343111

C 2.779108 9.204174 13.967551

H 1.697760 9.008124 13.982566

C 3.631202 8.530229 14.857799

H 3.220116 7.806005 15.574881

C 5.014519 8.784974 14.822574

H 5.690458 8.257080 15.509426

C 5.538452 9.713762 13.908706

H 6.620402 9.903078 13.886114

C 4.115153 12.359098 10.881215

C 4.085495 12.421811 9.470263

H 4.857588 11.910607 8.882178

C 3.070375 13.135186 8.808262

H 3.060469 13.168160 7.709678

C 2.073584 13.797174 9.545863

H 1.275780 14.347768 9.028138

C 2.106189 13.754689 10.951466

H 1.338177 14.278000 11.537711

C 3.124527 13.050768 11.616429

H 3.140902 13.040922 12.713354

C 6.019334 10.206713 10.507438

C 7.342523 10.115865 10.035162

H 8.106897 10.822764 10.377015

C 7.696268 9.115409 9.108605

H 8.732584 9.059192 8.749559

C 6.735541 8.202290 8.646653

H 7.014655 7.423580 7.922994

C 5.410888 8.286784 9.117532

H 4.651542 7.575422 8.764514

C 5.055810 9.278735 10.044064

H 4.021781 9.328176 10.409483

|  |
| --- |

**Table S5**. DFT calculated frontier molecular orbital composition (%) in the ground state for

**2**(Me).

| Orbital | Energy (eV) | Contribution (%) | | | | |
| --- | --- | --- | --- | --- | --- | --- |
| Ru | PPh3 | hp | RL | CO |
| LUMO+5 | -0.7307 | 2.5 | 44.5 | 52.0 | 0.0 | 1.0 |
| LUMO+4 | -0.7695 | 2.2 | 68.7 | 26.9 | 0.8 | 1.4 |
| LUMO+3 | -0.9049 | 2.6 | 94.1 | 2.1 | 1.0 | 0.2 |
| LUMO+2 | -0.9474 | 2.1 | 87.2 | 8.2 | 0.9 | 1.6 |
| LUMO+1 | -1.0811 | 18.0 | 77.4 | 4.5 | 0.0 | 0.1 |
| LUMO | -1.5059 | 0.2 | 0.1 | 0.7 | 99.0 | 0.0 |
| HOMO | -4.9430 | 23.0 | 1.2 | 3.5 | 71.8 | 0.8 |
| HOMO-1 | -5.4050 | 13.4 | 0.9 | 15.9 | 69.1 | 0.7 |
| HOMO-2 | -5.6564 | 6.2 | 3.3 | 70.5 | 18.0 | 2.0 |
| HOMO-3 | -6.0354 | 65.2 | 1.3 | 9.2 | 4.8 | 19.5 |
| HOMO-4 | -6.1513 | 31.8 | 40.0 | 4.4 | 21.4 | 2.4 |
| HOMO-5 | -6.2689 | 11.7 | 55.6 | 2.1 | 30.5 | 0.1 |

**Table S6**. DFT calculated frontier molecular orbital composition (%) in the ground state for

**2**(OMe).

| Orbital | Energy (eV) | Contribution (%) | | | | |
| --- | --- | --- | --- | --- | --- | --- |
| Ru | PPh3 | hp | RL | CO |
| LUMO+5 | -0.7128 | 2.2 | 46.5 | 50.5 | 0.0 | 0.8 |
| LUMO+4 | -0.7597 | 2.3 | 66.4 | 30.6 | 0.4 | 0.3 |
| LUMO+3 | -0.8904 | 2.6 | 95.0 | 1.3 | 0.8 | 0.3 |
| LUMO+2 | -0.9368 | 1.9 | 86.9 | 9.6 | 0.5 | 1.1 |
| LUMO+1 | -1.0672 | 12.8 | 78.8 | 7.0 | 0.1 | 1.3 |
| LUMO | -1.4797 | 0.1 | 0.3 | 0.1 | 99.5 | 0.0 |
| HOMO | -4.9026 | 22.4 | 1.5 | 2.9 | 72.8 | 0.4 |
| HOMO-1 | -5.2709 | 12.3 | 0.1 | 18.6 | 67.7 | 1.3 |
| HOMO-2 | -5.6175 | 5.1 | 1.6 | 69.3 | 22.0 | 2.0 |
| HOMO-3 | -6.0156 | 61.1 | 1.1 | 12.9 | 4.3 | 20.6 |
| HOMO-4 | -6.0586 | 32.3 | 30.4 | 3.6 | 31.5 | 2.2 |
| HOMO-5 | -6.2240 | 9.9 | 73.1 | 9.9 | 6.7 | 0.4 |

**Table S7**. DFT calculated frontier molecular orbital composition (%) in the ground state for

**2**(Cl).

| Orbital | Energy (eV) | Contribution (%) | | | | |
| --- | --- | --- | --- | --- | --- | --- |
| Ru | PPh3 | hp | RL | CO |
| LUMO+5 | -0.7623 | 2.6 | 47.7 | 48.7 | 0.0 | 1.0 |
| LUMO+4 | -0.8464 | 4.2 | 69.1 | 24.2 | 1.0 | 1.5 |
| LUMO+3 | -0.9814 | 3.6 | 94.9 | 1.0 | 0.5 | 0.0 |
| LUMO+2 | -1.0404 | 1.5 | 88.8 | 9.2 | 0.0 | 0.5 |
| LUMO+1 | -1.1633 | 12.7 | 81.0 | 2.8 | 2.0 | 1.5 |
| LUMO | -1.7366 | 0.0 | 1.0 | 0.0 | 99.0 | 0.0 |
| HOMO | -5.1077 | 25.5 | 2.0 | 12.1 | 60.4 | 0.0 |
| HOMO-1 | -5.5531 | 11.5 | 1.2 | 14.3 | 69.7 | 3.3 |
| HOMO-2 | -5.7264 | 7.5 | 2.7 | 42.0 | 46.8 | 1.0 |
| HOMO-3 | -6.1177 | 68.7 | 2.9 | 15.5 | 5.5 | 7.4 |
| HOMO-4 | -6.2492 | 30.6 | 41.2 | 5.8 | 20.3 | 2.1 |
| HOMO-5 | -6.4370 | 11.7 | 35.6 | 2.0 | 48.3 | 2.4 |
